# Supplementary material
Source: publisher figshare collection journal article supplement (https://geolsoc.figshare.com/ndownloader/files/5431607)
Supplement: Supplementary file 1 [file 5431607]

Leachate concentrations of kinetic batch tests over a 20-week test period
S32/dark
Week	Vol	Al	Ca	Cd	Co	Cu	Fe	K	Li	Mg	Mn	Na	Pb	Sr	Zn	V	Cl-	F-	Alk	pH	EC	Eh	DO (mg/L)	DO (%)
1	330	na	na	0.069	0.206	bd	0.6	na	0.048	na	0.17	na	0.032	na	bd	na	na	na	175	8	39600	298	5	53
2	290	na	na	0.015	0.051	0.047	0.4	na	0.027	na	0.334	na	0.047	na	0.017	na	na	na	123	7.9	40700	315	4	48
3	270	na	na	0.011	0.016	0.051	0.8	na	bd	na	0.311	na	0.031	na	0.046	na	na	na	135	8	31900	316	4	46
4	265	na	na	bd	0.019	0.088	0.3	na	0.039	na	0.349	na	bd	na	0.047	na	na	na	143	7.8	47200	320	3	40
5	269	na	na	0.017	0.016	0.056	0.2	na	0.058	na	0.322	na	0.038	na	0.041	na	na	na	125	7.6	54300	339	4	50
6	266	na	na	0.016	0.024	0.04	0.6	na	0.078	na	0.332	na	0.036	na	0.066	na	na	na	145	7.8	48200	340	3	33
7	266	na	na	0.03	0.033	0.036	0.2	na	0.124	na	0.369	na	0.038	na	0.063	na	na	na	105	7.7	50600	340	4	52
8	189	na	na	0.013	0.028	bd	0.1	na	0.068	na	0.222	na	0.045	na	0.076	na	na	na	140	7.4	41000	416	4	47
9	250	na	na	0.014	0.027	0.102	0.1	na	0.051	na	0.303	na	0.13	na	0.089	na	na	na	135	7.5	44100	335	4	54
10	273	na	na	0.016	0.031	0.142	0.1	na	0.041	na	0.263	na	0.12	na	0.084	na	na	na	123	7.7	45000	350	4	50
11	270	na	na	0.015	0.02	0.022	0	na	0.052	na	0.179	na	0.04	na	0.045	na	na	na	133	7.7	44200	340	5	52
12	259	na	na	0.01	0.024	0.032	0	na	0.048	na	0.147	na	bd	na	0.072	na	na	na	125	7.7	42500	445	3	44
13	301	na	na	0.019	0.025	0.049	0	na	0.039	na	0.171	na	bd	na	0.063	na	na	na	113	7.4	41600	445	4	45
14	225	na	na	0.019	0.025	0.012	0	na	0.038	na	0.157	na	0.038	na	0.045	na	na	na	128	7.3	40600	434	4	47
15	321	na	na	0.012	0.018	0.048	0.3	na	bd	na	0.152	na	0.095	na	0.072	na	na	na	143	7.3	40000	428	5	66
16	266	na	na	bd	0.022	0.054	0.1	na	0.015	na	0.128	na	0.011	na	0.039	na	na	na	125	7.5	41000	420	5	58
17	274	na	na	bd	0.02	0.13	0.4	na	0.022	na	0.115	na	0.205	na	0.065	na	na	na	128	7.5	43400	474	5	59
18	271	na	na	0.014	0.033	0.024	0	na	0.05	na	0.122	na	0.05	na	0.047	na	na	na	125	7.4	44400	440	5	51
19	264	na	na	bd	0.027	0.011	0	na	0.044	na	0.094	na	0.022	na	0.067	na	na	na	125	7.2	41500	469	3	35
20	279	na	na	bd	0.039	0.264	0	na	0.077	na	0.357	na	0.744	na	0.033	na	na	na	123	7.6	42200	464	6	68
D32/dark
Week	Vol	Al	Ca	Cd	Co	Cu	Fe	K	Li	Mg	Mn	Na	Pb	Sr	Zn	V	Cl-	F-	Alk	pH	EC	Eh	DO (mg/L)	DO (%)
1	352	bd	435.8	0.331	0.596	bd	1.6	na	0.031	7.5	0.008	na	0.029	0.584	0.046	bd	24.6	0.484	73	8.8	1070	265	4	49
2	297	0.384	148.5	0.154	0.085	0.03	0.7	5.2	0.093	8.3	bd	51.9	bd	0.274	bd	0.006	3.4	0.186	20	8.6	241	279	5	57
3	277	0.418	71	0.065	0.02	0.029	0.3	2.3	0.066	4	bd	14.6	bd	0.163	bd	bd	3.7	0.259	33	8.6	179	291	5	58
4	257	0.383	65.1	0.026	0.01	0.033	0.2	2	0.063	3.4	bd	9.5	bd	0.145	bd	bd	39.8	0.373	43	8.3	107	312	5	57
5	202	0.427	61.9	0.032	0.008	0.033	0.2	1.6	0.06	2.8	bd	6.6	bd	0.128	bd	bd	22.6	0.179	37	7.8	133	262	6	63
6	269	0.463	112.7	0.013	0.029	0.049	0.4	5.3	0.087	11.8	0.047	48.2	0.014	0.194	bd	bd	0.7	0.176	na	7.9	234	150	4	49
7	272	0.358	48.9	bd	bd	0.162	0.1	2.5	0.063	4.4	bd	17.9	bd	0.117	bd	bd	6	0.149	na	7.7	129	279	6	72
8	174	0.424	31.5	0.024	bd	0.02	0.1	na	0.019	1.2	bd	na	0.006	0.067	bd	0.017	4.6	0.15	40	8.2	120	409	2	28
9	193	0.254	47.6	bd	0.006	0.073	0.3	na	0.11	11.1	0.008	na	0.034	0.15	0.045	bd	9.4	0.193	47	8	288	350	5	58
10	269	bd	48.6	0.015	0.014	0.026	0.6	9.2	0.064	7.1	0.018	80.2	0.024	0.115	0.022	0.007	163.9	0.128	43	8	715	345	5	51
11	274	bd	31.2	0.024	0.01	bd	0.7	7.7	0.048	14.5	0.01	99.9	0.006	0.097	0.012	bd	8.6	0.07	43	8.4	214	357	4	54
12	113	bd	17	0.015	bd	bd	0.5	4	0.029	1.6	0.009	7.5	0.005	0.039	0.01	0.006	6.4	0.099	40	7.8	131	468	4	54
13	177	bd	21.7	0.016	0.005	bd	0.5	4.7	0.034	1.7	0.009	7.4	bd	0.044	0.012	bd	5.8	0.095	43	7.8	168	465	4	41
14	252	bd	31.8	0.019	0.008	bd	0.5	6.2	0.052	2.8	0.01	12.1	bd	0.07	0.019	bd	6.6	0.099	73	7.8	192	465	5	58
15	278	0.094	70.2	0.009	bd	bd	0.3	18.9	0.063	40.2	0.022	327.6	bd	0.331	0.009	bd	182	0.068	60	8	114	450	6	75
16	267	0.242	24.7	0.015	bd	bd	0.2	6.3	0.035	3.8	0.007	23.3	bd	0.071	bd	bd	23.1	0.061	37	8.2	211	447	6	64
17	271	0.262	24.3	0.011	bd	0.02	0.2	2.4	0.025	2.6	0.007	6.7	0.013	0.05	0.008	bd	5.4	0.089	37	8.2	141	255	7	77
18	279	0.218	20.8	0.009	bd	0.006	0.1	1.6	0.02	1.8	bd	1.8	bd	0.035	0.006	0.008	0.2	0.061	47	8.2	29	430	6	66
19	271	0.277	18	0.008	bd	bd	0	3.2	0.018	1.4	bd	4.3	bd	0.03	0.012	0.007	8.6	0.059	27	5.2	117	519	5	62
20	273	0.122	20.6	0.006	bd	0.017	0.1	3.6	0.018	9.2	bd	66.8	0.009	0.073	0.021	bd	39.5	0.081	50	7.5	123	556	6	65
Samb/dark
Week	Vol	Al	Ca	Cd	Co	Cu	Fe	K	Li	Mg	Mn	Na	Pb	Sr	Zn	V	Cl-	F-	Alk	pH	EC	Eh	DO (mg/L)	DO (%)
1	326	na	na	0.058	0.196	bd	0.5	na	0.044	na	0.134	na	0.025	na	bd	na	na	na	143	8.2	39500	294	4	46
2	295	na	na	0.051	0.053	0.044	0.3	na	0.051	na	0.175	na	0.062	na	0.03	na	na	na	110	7.9	40300	336	4	44
3	266	na	na	0.036	0.03	0.026	0.2	na	0.022	na	0.172	na	0.013	na	0.053	na	na	na	133	7.8	32000	290	5	66
4	267	na	na	0.024	0.05	0.035	0.6	na	0.068	na	0.247	na	0.016	na	0.067	na	na	na	143	7.8	51000	359	4	42
5	270	na	na	0.024	0.034	0.024	0.1	na	0.057	na	0.198	na	0.022	na	0.074	na	na	na	n.a.	7.8	53800	362	5	52
6	272	na	na	0.014	0.047	0.044	1.7	na	0.043	na	0.228	na	0.058	na	0.079	na	na	na	143	7.7	47600	249	4	42
7	270	na	na	0.012	0.019	0.044	1.2	na	bd	na	0.113	na	bd	na	0.037	na	na	na	135	7.8	51000	342	5	58
8	182	na	na	0.012	0.029	0.018	0.1	na	0.066	na	0.113	na	0.056	na	0.051	na	na	na	na	7.6	41000	419	4	53
9	192	na	na	0.02	0.026	0.033	0.2	na	0.043	na	0.128	na	0.066	na	0.052	na	na	na	na	8	44800	330	6	63
10	268	na	na	0.018	0.039	0.073	0.1	na	0.046	na	0.183	na	0.074	na	0.088	na	na	na	130	7.4	44700	362	5	49
11	273	na	na	0.011	0.018	0.064	0.1	na	bd	na	0.08	na	bd	na	0.071	na	na	na	167	7.8	44200	364	5	50
12	227	na	na	0.018	0.033	0.019	0	na	0.046	na	0.093	na	0.012	na	0.061	na	na	na	128	7.7	42200	473	4	44
13	232	na	na	0.016	0.028	0.047	0	na	0.03	na	0.088	na	0.027	na	0.056	na	na	na	150	7.6	40300	488	4	43
14	237	na	na	0.015	0.023	0.047	0.1	na	0.025	na	0.068	na	0.053	na	0.06	na	na	na	140	7.6	39800	482	4	48
15	273	na	na	na	na	na	na	na	na	na	na	na	na	na	na	na	na	na	137	7.6	43000	457	6	65
16	254	na	na	bd	0.013	0.055	0.1	na	bd	na	0.043	na	0.047	na	0.031	na	na	na	130	7.7	41000	445	6	58
17	273	na	na	bd	0.026	0.05	0.2	na	0.029	na	0.056	na	0.026	na	0.09	na	na	na	130	7.6	43600	510	6	68
18	170	na	na	0.013	0.034	0.03	0.2	na	0.05	na	0.069	na	0.081	na	0.065	na	na	na	125	7.6	43400	444	6	59
19	270	na	na	bd	0.02	0.015	0.2	na	0.028	na	0.041	na	0.042	na	0.073	na	na	na	118	7.5	42400	522	6	59
20	273	na	na	bd	0.023	0.027	0.5	na	0.013	na	0.026	na	0.047	na	0.084	na	na	na	143	7.7	42600	468	7	71
Damb/dark
Week	Vol	Al	Ca	Cd	Co	Cu	Fe	K	Li	Mg	Mn	Na	Pb	Sr	Zn	V	Cl-	F-	Alk	pH	EC	Eh	DO (mg/L)	DO (%)
1	360	na	410	0.354	0.649	bd	1.1	bd	0.04	6.1	bd	na	0.03	0.584	0.068	0.005	26.1	0.457	73	8.9	1045	282	5	57
2	291	0.396	146.8	0.176	0.075	0.029	0.6	3.9	0.077	4.3	bd	32.3	bd	0.216	bd	0.008	3	0.18	35	8.8	217	294	5	60
3	272	0.478	56.2	0.071	0.015	0.031	0.4	2	0.055	3.2	bd	14.9	bd	0.121	bd	bd	3.9	0.197	37	9	124	279	6	66
4	216	0.405	55.5	0.043	0.007	0.112	0.1	1.3	0.051	2.5	bd	8.3	bd	0.107	bd	bd	1	0.196	47	8.9	121	272	5	60
5	239	0.447	87.3	0.037	0.009	0.061	0.2	1.5	0.065	3.5	bd	6.7	bd	0.153	0.012	bd	3.8	0.185	65	8.5	124	278	6	63
6	271	0.351	76.4	0.019	0.027	0.052	0.8	1.7	0.069	3.4	0.02	6.1	0.01	0.144	bd	0.006	2.6	0.171	33	8.6	146	250	5	57
7	270	0.451	45.2	bd	bd	0.102	0.2	1.6	0.055	2.8	bd	6.9	0.021	0.105	bd	bd	1.2	0.092	33	8.4	146	267	5	62
8	135	0.425	69.3	0.135	0.035	0.012	0.2	bd	bd	6.1	bd	na	0.025	0.103	0.037	bd	2.7	0.125	47	8.5	98	375	4	44
9	197	0.243	34.2	0.008	bd	0.019	0.3	bd	0.051	3.2	bd	na	0.012	0.087	0.006	bd	43.2	0.157	33	8.2	308	317	5	59
10	293	na	1.5	bd	bd	bd	0	0.2	0.016	0.2	0.006	1.4	bd	0.005	bd	bd	53.6	0.112	35	8.5	297	312	5	54
11	256	na	17.1	0.018	bd	bd	0.1	1.5	0.022	1.1	0.009	6.3	bd	0.035	0.045	bd	3.1	0.057	23	8.8	121	325	5	58
12	320	na	11.9	0.016	bd	0.005	0.1	1.4	0.022	0.9	0.008	3.8	bd	0.03	bd	0.006	3.1	0.06	53	8.3	96	473	4	42
13	316	na	18	0.015	0.006	bd	0.1	2.2	0.027	1.3	0.008	7	bd	0.038	0.02	bd	4.5	0.078	27	8.1	90	481	4	48
14	289	na	86.4	bd	0.006	0.046	0	1.7	0.02	5.4	0.108	30.8	0.03	0.167	0.012	bd	4	0.089	17	8.1	44	469	4	52
15	272	0.115	45.8	0.015	0.006	bd	0.7	5.2	0.047	4.7	0.014	21.5	0.02	0.103	bd	bd	3.2	0.1	27	8.2	19	472	6	67
16	257	1.62	22.7	0.017	0.009	bd	2.2	2.5	0.03	2	0.044	4.1	0.052	0.062	0.095	0.008	2.9	0.064	17	8.5	111	459	7	na
17	271	0.387	21	0.012	bd	0.016	0.5	2.7	0.028	1.7	0.008	7.7	0.009	0.053	0.012	0.005	2	n.a.	33	8.6	104	616	7	75
18	271	0.185	22.4	0.009	bd	0.01	0.2	4.6	0.027	9.4	bd	72	bd	0.083	0.011	0.006	0.8	3.366	43	8.4	28	447	7	70
19	269	0.289	15.9	0.009	bd	0.009	0.2	1.5	0.019	0.7	bd	0.8	0.009	0.027	0.023	0.007	8	0.05	30	8.7	89	544	6	67
20	271	0.207	15.2	0.006	bd	0.01	0.1	1.4	0.016	0.8	bd	2.8	0.006	0.026	0.07	0.005	5.5	0.08	40	8.7	104	556	7	71
S5/dark
Week	Vol	Al	Ca	Cd	Co	Cu	Fe	K	Li	Mg	Mn	Na	Pb	Sr	Zn	V	Cl-	F-	Alk	pH	EC	Eh	DO (mg/L)	DO (%)
1	330	na	na	0.054	0.193	bd	0.2	na	0.031	na	0.097	na	0.022	na	bd	na	na	na	178	8.6	41100	243	6	75
2	287	na	na	0.04	0.049	bd	0.1	na	0.038	na	0.121	na	0.034	na	bd	na	na	na	120	8.3	33200	277	8	87
3	262	na	na	0.032	0.023	0.025	0.1	na	0.025	na	0.112	na	0.034	na	0.017	na	na	na	118	8.3	31600	293	7	77
4	268	na	na	0.023	0.028	bd	0	na	0.052	na	0.127	na	0.015	na	bd	na	na	na	173	7.9	40100	316	1	11
5	274	na	na	0.025	0.024	0.027	0.1	na	0.055	na	0.119	na	0.025	na	0.034	na	na	na	108	8.1	52400	374	8	74
6	267	na	na	0.014	0.037	0.018	0.3	na	0.042	na	0.12	na	0.085	na	0.033	na	na	na	105	8.2	44500	181	6	57
7	269	na	na	0.042	0.091	0.149	1.3	na	0.213	na	0.296	na	0.264	na	0.13	na	na	na	125	8.1	49700	336	7	74
8	138	na	na	bd	0.04	0.014	0.1	na	0.058	na	0.095	na	0.034	na	0.048	na	na	na	135	7.8	40800	430	7	67
9	187	na	na	bd	0.051	0.048	0.2	na	0.092	na	0.142	na	0.041	na	0.068	na	na	na	118	8.1	43700	363	7	73
10	279	na	na	bd	0.056	0.111	0.1	na	0.078	na	0.152	na	0.045	na	0.113	na	na	na	125	7.7	45100	373	7	73
11	270	na	na	bd	0.016	0.047	0.1	na	bd	na	0.053	na	0.058	na	0.047	na	na	na	73	8.1	23200	352	8	77
12	230	na	na	bd	0.034	0.018	0	na	0.036	na	0.09	na	0.013	na	0.066	na	na	na	135	7.6	40500	464	7	67
13	228	na	na	bd	0.043	0.025	0	na	0.035	na	0.094	na	0.043	na	0.051	na	na	na	147	7.6	46370	446	5	64
14	308	na	na	bd	0.052	0.045	na	na	0.029	na	0.103	na	0.014	na	0.068	na	na	na	135	7.6	41870	443	4	49
15	273	na	na	bd	0.053	0.065	0.2	na	0.029	na	0.126	na	0.072	na	0.232	na	na	na	140	7.7	39800	439	7	67
16	301	na	na	bd	0.049	0.018	0.3	na	0.032	na	0.083	na	0.081	na	0.069	na	na	na	123	7.6	41300	389	9	86
17	271	na	na	bd	0.044	0.03	0.2	na	0.038	na	0.067	na	0.068	na	0.075	na	na	na	128	7.7	44500	528	8	76
18	269	na	na	bd	0.052	0.016	0.1	na	0.056	na	0.065	na	0.015	na	0.069	na	na	na	135	7.4	44900	432	10	89
19	274	na	na	bd	0.045	0.047	0.1	na	0.024	na	0.056	na	0.023	na	0.107	na	na	na	123	7.5	43100	507	8	69
20	270	na	na	bd	0.048	0.076	0	na	0.028	na	0.057	na	0.017	na	0.113	na	na	na	123	7.8	42700	523	7	63
D5/dark
Week	Vol	Al	Ca	Cd	Co	Cu	Fe	K	Li	Mg	Mn	Na	Pb	Sr	Zn	V	Cl-	F-	Alk	pH	EC	Eh	DO (mg/L)	DO (%)
1	357	bd	432.3	0.198	0.473	bd	0.5	na	bd	7.1	0.006	na	0.028	0.484	0.109	bd	26.5	0.576	87	9.1	985	252	7	78
2	298	0.221	60.6	0.04	0.012	0.026	0.2	2.9	0.051	2.4	bd	29	bd	0.12	bd	bd	11	0.196	35	9.1	190	271	8	80
3	244	0.383	41.3	0.047	bd	0.034	0.2	1.6	0.046	1.7	bd	10.7	bd	0.089	bd	bd	2.8	0.188	30	9.3	100	267	7	76
4	197	0.384	47.5	0.039	bd	0.032	0.1	1.3	0.046	1.8	bd	7	bd	0.096	bd	bd	4	0.161	53	9.3	2	239	8	87
5	263	0.419	56.1	0.048	bd	0.047	0.1	1.2	0.048	2	bd	5.3	bd	0.104	bd	bd	1.5	0.156		9.3	80	260	8	88
6	274	0.515	60.7	0.05	bd	0.035	0.3	1.3	0.048	2.2	bd	4.7	0.007	0.108	bd	bd	2.7	0.136	40	9.1	122	236	9	88
7	267	1.48	28	bd	bd	0.045	2.1	1.3	0.041	2.1	bd	4.9	0.01	0.074	0.02	bd	6.9	0.129	40	9.1	97	266	8	91
8	160	0.299	20.6	0.018	bd	0.01	0.1	na	bd	1	bd	na	bd	0.042	bd	0.014	3.4	0.089	47	9.2	61	372	6	61
9	202	0.226	28.2	0.03	bd	0.022	0.2	na	0.019	1.2	bd	na	0.012	0.049	0.012	0.006	4.3	0.09	30	8.7	95	298	7	79
10	315	bd	17.9	0.047	0.009	bd	0.1	0.7	0.024	0.7	0.008	2.4	0.013	0.046	0.043	0.01	3.1	0.076	43	9	95	296	7	76
11	270	bd	15	0.016	bd	0.01	0	1.2	0.021	0.9	0.008	6	bd	0.042	na	0.006	2.5	0.054	50	8.9	97	290	8	84
12	230	bd	12.1	0.012	bd	0.013	0	1.2	0.021	0.8	0.008	4.4	bd	0.035	bd	bd	8.1	0.064	30	8.1	120	478	8	72
13	206	bd	15.9	0.015	bd	0.019	0.1	1.5	0.021	0.9	0.01	6	bd	0.038	bd	bd	8.4	0.069	27	8	107	473	5	64
14	264	bd	17.3	0.016	bd	0.045	0.1	1.5	0.022	1	0.009	5.2	0.005	0.041	0.009	0.006	5.6	0.066	37	8.1	113	481	6	67
15	377	0.249	26.6	0.017	bd	0.009	0.1	2.7	0.024	2.5	0.009	14.7	0.008	0.029	bd	bd	5.3	0.072	57	8.7	11	467	7	73
16	114	0.153	11.7	0.006	bd	0.005	0.2	1.1	0.019	0.9	0.007	3.5	bd	0.019	bd	bd	4.7	0.053	23	9.2	64	384	8	85
17	256	0.321	16.5	0.01	bd	0.025	0.5	1.6	0.024	1.4	0.013	5.4	0.047	0.048	0.022	bd	6.4	0.105	53	8.6	104	580	8	87
18	276	0.211	21	0.009	bd	0.007	0.1	1.6	0.019	1.7	bd	1.3	bd	0.035	bd	0.007	0.1	0.074	57	9	18	430	10	95
19	282	0.243	11.6	0.013	bd	0.02	0.1	1	0.016	0.7	bd	1.2	0.027	0.026	0.026	0.006	2.9	0.053	30	9.3	54	534	9	74
20	282	0.175	15.6	0.006	bd	0.01	0.1	2	0.016	0.6	bd	2.5	0.015	0.025	0.018	0.006	5.8	0.091	50	9	71	585	8	69
Samb/light
Week	Vol	Al	Ca	Cd	Co	Cu	Fe	K	Li	Mg	Mn	Na	Pb	Sr	Zn	V	Cl-	F-	Alk	pH	EC	Eh	DO (mg/L)	DO (%)
1	356	na	na	na	na	na	na	na	na	na	na	na	na	na	na	na	na	na	153	8	40400	291	4	45
2	288	na	na	0.049	0.037	0.022	0.2	na	0.062	na	0.184	na	0.033	na	0.013	na	na	na	135	7.9	39500	340	4	42
3	270	na	na	0.039	0.023	0.06	0.2	na	0.021	na	0.153	na	0.036	na	0.052	na	na	na	138	8	10340	259	4	45
4	273	na	na	0.022	0.047	0.084	0.1	na	0.052	na	0.232	na	bd	na	0.071	na	na	na	130	7.8	51400	359	4	47
5	265	na	na	0.025	0.043	0.026	0.1	na	0.061	na	0.216	na	0.045	na	0.069	na	na	na	125	7.7	53900	363	4	50
6	270	na	na	0.016	0.049	0.052	0.5	na	0.05	na	0.226	na	0.067	na	0.094	na	na	na	158	7.7	47800	157	4	49
7	269	na	na	0.025	0.031	0.072	1.8	na	0.073	na	0.208	na	0.03	na	0.098	na	na	na	153	7.7	41100	335	5	55
8	166	na	na	0.014	0.036	bd	0.1	na	0.059	na	0.14	na	0.108	na	0.08	na	na	na	130	7.5	40700	420	4	51
9	214	na	na	0.018	0.038	0.075	0.2	na	0.053	na	0.208	na	0.043	na	0.085	na	na	na	145	7.7	44100	344	5	52
10	267	na	na	0.014	0.043	0.064	0.1	na	0.021	na	0.21	na	0.031	na	0.113	na	na	na	157	7.4	45000	322	5	57
11	270	na	na	0.018	0.027	0.084	0.2	na	0.019	na	0.119	na	0.244	na	0.079	na	na	na	125	7.8	44100	348	5	57
12	219	na	na	0.033	0.061	0.097	0.1	na	0.083	na	0.288	na	0.153	na	0.131	na	na	na	145	7.3	42100	463	4	50
13	224	na	na	0.02	0.031	0.043	0.1	na	0.043	na	0.108	na	0.04	na	0.134	na	na	na	127	7.4	38600	476	4	49
14	226	na	na	0.016	0.029	bd	0.1	na	0.029	na	0.087	na	0.058	na	0.063	na	na	na	105	6.8	40800	484	5	61
15	279	na	na	0.012	0.024	0.032	0.5	na	bd	na	0.082	na	0.101	na	0.07	na	na	na	117	7.6	42700	450	6	69
16	268	na	na	na	na	na	na	na	na	na	na	na	na	na	na	na	na	na	125	7.4	39500	427	7	69
17	265	na	na	0.011	0.028	0.14	0.1	na	0.032	na	0.057	na	0.046	na	0.072	na	na	na	140	7.6	43400	522	6	63
18	268	na	na	0.012	0.033	0.101	0.2	na	0.044	na	0.06	na	0.071	na	0.069	na	na	na	118	7.6	44300	441	6	66
19	269	na	na	bd	0.022	0.024	0.1	na	0.032	na	0.039	na	0.06	na	0.076	na	na	na	na	7.5	42000	479	7	68
20	275	na	na	bd	0.033	0.247	bd	na	0.061	na	0.322	na	0.264	na	0.05	na	na	na	120	7.7	42400	460	7	72
Damb/light
Week	Vol	Al	Ca	Cd	Co	Cu	Fe	K	Li	Mg	Mn	Na	Pb	Sr	Zn	V	Cl-	F-	Alk	pH	EC	Eh	DO (mg/L)	DO (%)
1	287	bd	680.2	0.387	0.893	bd	1.7	na	0.086	9.6	0.012	na	0.028	0.792	0.08	bd	17.1	1.095	80	8.6	1228	268	4	53
2	290	0.304	151.2	0.175	0.059	0.035	0.3	4.2	0.075	4.4	bd	37.8	bd	0.218	bd	bd	3.7	0.213	35	8.7	276	620	6	63
3	269	0.458	59	0.054	0.012	0.029	0.4	1.6	0.053	3	bd	9.1	bd	0.131	bd	bd	1.8	0.138	27	8.8	146	276	6	63
4	259	0.333	66.4	0.028	0.009	0.065	0.1	1.4	0.054	2.8	bd	6.6	bd	0.127	bd	bd	3.3	0.202	37	8.6	161	279	6	70
5	262	0.342	76.5	0.029	bd	0.031	0.1	1.2	0.054	2.6	bd	4.9	bd	0.129	bd	bd	1.5	0.114	40	8.6	117	242	6	68
6	245	0.447	94.3	0.026	bd	0.063	0.3	1.7	0.065	3.7	bd	7.1	0.01	0.154	bd	0.012	1.4	0.102	40	8	201	197	5	54
7	272	0.366	48.3	bd	bd	0.085	0.2	1.8	0.058	2.3	bd	5.1	bd	0.108	bd	bd	3.4	0.137	33	8.4	167	266	6	64
8	168	0.474	25.6	0.027	bd	0.022	0.1	na	0.011	0.9	bd	na	bd	0.057	bd	0.015	2.7	0.149	37	8.2	101	409	4	53
9	200	0.373	38.7	0.009	bd	0.048	0.5	na	0.098	13.1	bd	na	bd	0.145	0.009	0.01	9.9	0.166	40	8.2	254	348	5	61
10	269	na	33.6	0.018	0.006	0.013	0.1	5.6	0.035	3.3	0.011	34	0.006	0.087	0.017	0.008	71.2	0.121	33	8.2	395	326	5	58
11	264	na	15.1	0.015	bd	0.014	0	1.5	0.022	1.5	0.009	9.1	0.009	0.035	0.009	bd	4.1	0.055	47	8.7	138	328	6	65
12	225	na	13.5	0.019	bd	bd	0.1	1.5	0.021	1	0.008	4.7	bd	0.03	bd	0.008	3.5	0.06	57	8.4	96	464	4	48
13	205	na	17.2	0.016	bd	0.006	0.1	2.4	0.027	2.6	0.009	16.5	bd	0.047	0.041	bd	4.7	0.079	40	8.1	98	451	4	52
14	208	na	30.6	0.018	0.008	0.038	0.5	3.8	0.038	2.2	0.009	7.5	bd	0.062	0.016	0.005	8	0.204	63	7.9	98	442	4	51
15	274	na	na	na	na	na	na	na	na	na	na	na	na	na	na	na	3.6	0.091	43	8.2	19	455	6	67
16	270	0.208	19.9	0.014	bd	0.006	0.3	2.8	0.028	1.2	0.005	3.3	bd	0.043	0.01	bd	2.2	0.062	37	8.6	105	455	7	76
17	269	0.228	18.7	0.012	bd	0.02	0.3	2.4	0.027	1.6	bd	8	bd	0.049	0.006	bd	1.1	0.093	53	8.5	99	534	7	80
18	267	0.244	20.3	0.01	bd	bd	0.3	2.3	0.023	1.5	bd	5.7	0.022	0.039	0.007	0.008	2.3	0.065	47	8.5	24	432	6	67
19	268	0.219	17.3	0.007	bd	0.026	0.1	1.8	0.018	0.9	bd	2.8	bd	0.031	0.02	0.006	5.3	0.056	30	8.7	95	505	6	67
20	208	0.164	15.4	0.006	bd	0.009	0.1	1.9	0.016	0.6	bd	2.3	0.01	0.025	0.014	0.005	4.7	0.322	30	8.5	101	545	7	72
concentrations in mg/L except DO, pH, EC (electrical conductivity in uS/cm), alkalinity in mg CaCO3 eq/ L, Eh in mV, DO in mg/L, Vol (volume in mL), na = not analysed, bd = below detection limit
